# Supplementary material for: Dynamic properties of the Sulfolobus CRISPR/Cas and CRISPR/Cmr systems when challenged with vector-borne viral and plasmid genes and protospacers
Source: PubMed Central journal article supplement (PMC3025118; doi:10.1111/j.1365-2958.2010.07452.x), 2011-01

Figure S1. Northern blot analysis of the processed RNA generated from CRISPR locus F from total cellular RNA extracts of *S. solfataricus* P2. Both 1. spacer 11 of locus F, and 2. the repeat sequence of cluster F (and E) were probed with matching oligonucleotide. M1 and M2 are DNA size ladders.

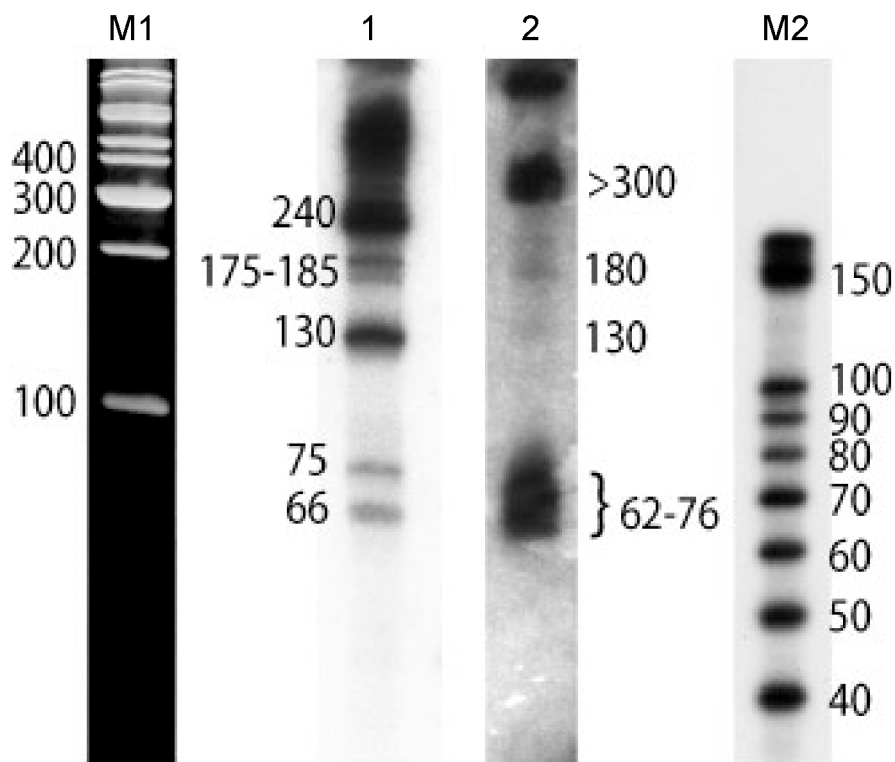

Figure S2. PCR amplification of CRISPR loci A and D of *S. solfataricus* P2. A. Agarose gel showing the position of the main 7.2 kb fragment amplified from locus A where the bracketed region of the gel shows the continuum of fragments that were cloned and sequenced. Shorter PCR elongation times (2.5 min. instead of 7 min.) were used to increase the relative yields of the smaller fragments. B. A summary of the sequencing results indicating the numbers of deleted spacers within locus A. The sequencing results from a closely similar experiment where a 7.1 kb fragment was amplified from locus D are also presented, again showing the deletion sizes detected for a small size range of DNA fragments. Each of the products had recombined at repeat sequences generating perfect repeat-spacer junctions.

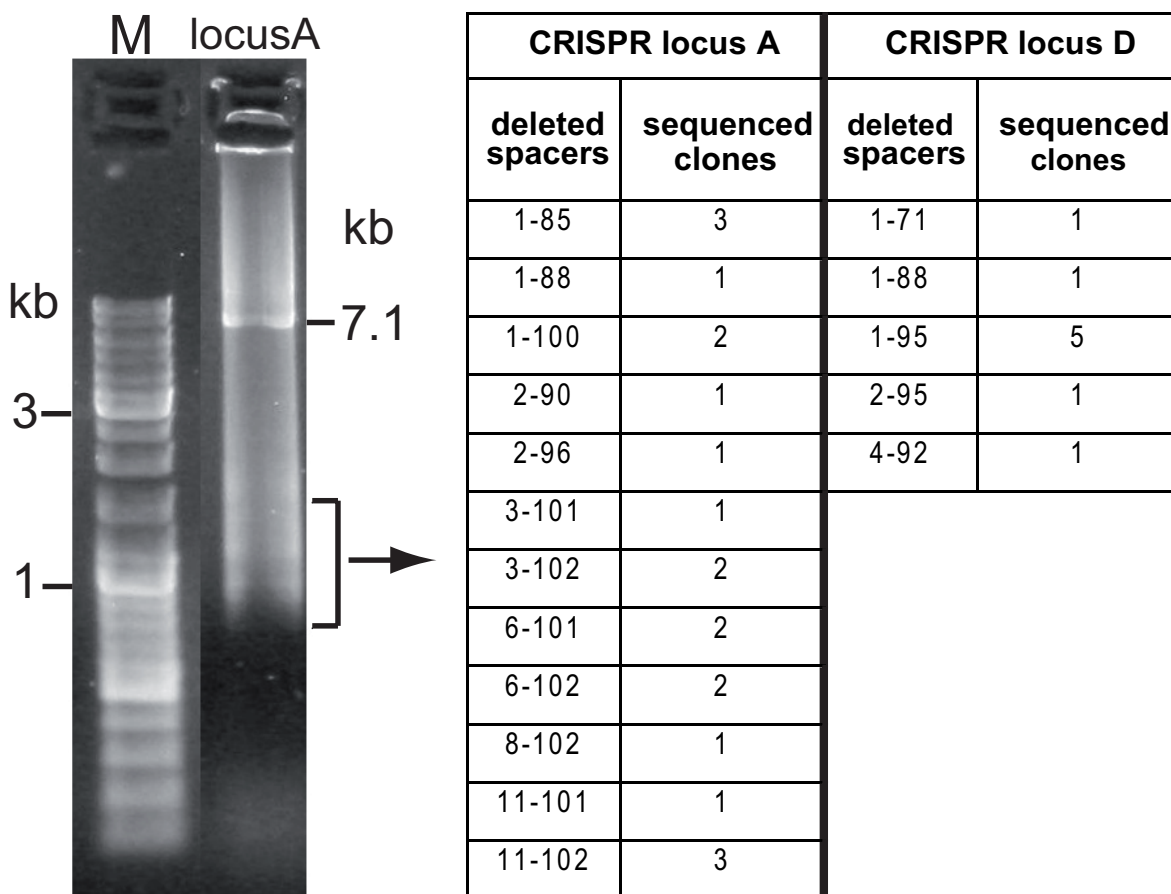

Supplement: mmi0079-0035-SD1.pdf [file mmi0079-0035-SD1.pdf]
